# Supplementary material
Source: PubMed Central journal article supplement (PMC7198848)
Supplement: mmc1.pdf [file mmc1.pdf]

# THE LANCET

## Respiratory Medicine

### Supplementary appendix 1

This translation in Arabic was submitted by the authors and we reproduce it as supplied. It has not been peer reviewed. *The Lancet's* editorial processes have only been applied to the original in English, which should serve as reference for this manuscript.

تم تقديم هذه الترجمة باللغة العربية من قبل المؤلفين ونعيد إنتاجها كما هو مُقدم. إنها لم تخضع لاستعراض الأقران. تم تطبيق عمليات تحرير لانسيت فقط على النص الأصلي باللغة الإنجليزية، والذي يجب أن يكون بمثابة مرجع لهذه المخطوطة.

Supplement to: Phua J, Weng L, Ling L, et al, for the Asian Critical Care Clinical Trials Group. Intensive care management of coronavirus disease 2019 (COVID-19): challenges and recommendations. *Lancet Respir Med* 2020; published online April 6. [https://doi.org/10.1016/S2213-2600\(20\)30161-2](https://doi.org/10.1016/S2213-2600(20)30161-2).

مع الانتشار الواسع لمرض كورونا المستجد ٢٠١٩ (COVID-19) في جميع أنحاء العالم، لابد لمجتمع طب العناية المركزة من الاستعداد للتحديات المرتبطة بهذا الوباء. ومن ذلك التركيز على التشخيص السريع والعزل والعلاج السريع والوقاية من العدوى، حيث أن أهمية ذلك لا تكمن فقط للمرضى الذين يعانون من مرض كورونا المستجد ٢٠١٩، ولكن أيضاً للعاملين في الرعاية الصحية والمرضى الآخرين المعرضين لخطر انتقال العدوى ضمن المستشفيات. وترتكز معالجة مرض كورونا المستجد ٢٠١٩ على معالجة القصور التنفسي الحاد ودعم الدورة الدموية. ويجب على الممارسين في وحدات العناية المركزة، ومسؤولي المستشفيات والحكومات وصانعي القرار الاستعداد لزيادة كبيرة في السعة الاستيعابية لأسرة العناية المركزة، على ألا يكون التركيز فقط على البنية التحتية والإمدادات، بل أن يشمل أيضاً إدارة الموظفين. وقد تكون هناك حاجة لتطبيق إجراءات فرز خاصة بالعناية المركزة من أجل الاستعمال الأمثل للموارد المحدودة لوحدات العناية المركزة. ويجب على الباحثين دراسة عدد من الأسئلة المهمة، بما في ذلك النظر في دور العلاجات المعاد استخدامها والعلاجات التجريبية. ولابد من تضافر الجهود على المستويات المحلية والوطنية والإقليمية والدولية لضمان أفضل الفرص لنجاة المصابين بحالات حرجة جراء مرض كورونا المستجد ٢٠١٩.
