# Supplementary material
Source: PubMed Central journal article supplement (PMC7198848)
Supplement: mmc2.pdf [file mmc2.pdf]

# THE LANCET

## Respiratory Medicine

### Supplementary appendix 2

This translation in Chinese was submitted by the authors and we reproduce it as supplied. It has not been peer reviewed. *The Lancet's* editorial processes have only been applied to the original in English, which should serve as reference for this manuscript.

此简体中文译文由作者提交，我方按照提供的版本刊登。此译文并未经过同行审阅。医学期刊《柳叶刀》的编辑流程仅适用于英文原稿，英文原稿应作为此手稿的参考。

Supplement to: Phua J, Weng L, Ling L, et al, for the Asian Critical Care Clinical Trials Group. Intensive care management of coronavirus disease 2019 (COVID-19): challenges and recommendations. *Lancet Respir Med* 2020; published online April 6. [https://doi.org/10.1016/S2213-2600\(20\)30161-2](https://doi.org/10.1016/S2213-2600(20)30161-2).

新型冠状病毒感染(COVID-19)已蔓延全球，重症医学(ICU)领域必须做好准备，应对大流行带来的挑战。精简包括快速诊断和隔离、临床处置、以及感染控制在内的工作流程，不仅有利于COVID-19患者，而且有利于医务工作者和其他有暴露风险的患者。急性呼吸衰竭以及循环的处理是关键。ICU医务人员、医院管理者、政府和政策制定者必须做好应急预案以应对ICU床位超负荷。不仅包括基础设施和物资供应，还包括人力资源管理。可能需要在资源有限情况下合理的分流措施。研究人员必须关注未解决的问题，包括老药新用和试验性治疗。地方、区域、国家和国际之间各层面的合作有助于提高患者存活率。
