# Supplementary material
Source: PubMed Central journal article supplement (PMC7198848)
Supplement: mmc3.pdf [file mmc3.pdf]

# THE LANCET

## Respiratory Medicine

### Supplementary appendix 3

This translation in Japanese was submitted by the authors and we reproduce it as supplied. It has not been peer reviewed. *The Lancet's* editorial processes have only been applied to the original in English, which should serve as reference for this manuscript.

この日本語による翻訳文書は、著者本人により提出されたものを当方で複製したものです。本訳文の内容は査読を経ておらず、『ランセット』誌による編集も、本訳文のもとになる英語原文に対してのみ行われていることをご了承ください。

Supplement to: Phua J, Weng L, Ling L, et al, for the Asian Critical Care Clinical Trials Group. Intensive care management of coronavirus disease 2019 (COVID-19): challenges and recommendations. *Lancet Respir Med* 2020; published online April 6. [https://doi.org/10.1016/S2213-2600\(20\)30161-2](https://doi.org/10.1016/S2213-2600(20)30161-2).

COVID-19が世界中に感染拡大している今、集中治療関係者はCOVID-19のパンデミックに備える必要がある。迅速な診断と隔離および感染者診療、感染予防を効率的に行うことは、感染患者だけでなく、医療従事者や院内感染のリスクがある他の患者においても重要である。

感染者治療においては、呼吸管理と循環管理が極めて重要である。集中治療関係者および病院管理者、政府、政策立案者はベッド数や機器数だけではなく、集中治療を行う医療従事者のマンパワーも念頭において集中治療室を要する患者数の急増に備える必要がある。患者数が集中治療の提供能力を上回った場合には、集中治療の配分を考慮するCritical care triageが必要となる。

既存の治療法や実験的に行われてきた治療法のCOVID-19に対する有効性を検証する研究が必須である。重症患者を可能な限り救命するためには、地区から地域、国、国際レベルでの協力が不可欠である。
