# Supplementary material
Source: PubMed Central journal article supplement (PMC7198848)
Supplement: mmc4.pdf [file mmc4.pdf]

# THE LANCET

## Respiratory Medicine

### Supplementary appendix 4

This translation in Korean was submitted by the authors and we reproduce it as supplied. It has not been peer reviewed. *The Lancet's* editorial processes have only been applied to the original in English, which should serve as reference for this manuscript.

한국어 번역은 저자들에 의해 제공되었으며 우리 학술지는 제공된 대로 실습니다. 이는 동료 검토를 거치지 않은 것입니다. Lancet의 편집 과정은 영어 원문에 국한된 것이며 이 원고에 대한 참조가 되어야 합니다.

Supplement to: Phua J, Weng L, Ling L, et al, for the Asian Critical Care Clinical Trials Group. Intensive care management of coronavirus disease 2019 (COVID-19): challenges and recommendations. *Lancet Respir Med* 2020; published online April 6. [https://doi.org/10.1016/S2213-2600\(20\)30161-2](https://doi.org/10.1016/S2213-2600(20)30161-2).

코로나바이러스2019병(COVID-19)이 전세계로 확산되고 있는 상황이므로 중환자 진료종사자들은 이 대유행 전염병의 의료적 도전에 대비해야 한다. 신속한 진단 및 격리, 치료와 감염예방을 위한 업무의 효율적 흐름은 COVID-19환자뿐만 아니라 병원내 감염에 노출될 수 있는 의료종사자 및 원내 전염의 위험에 노출된 다른 질환의 환자들에게도 중요하다. COVID-19중증환자의 치료에서는 급성호흡부전과 혈액학 관리가 핵심이다. 중환자진료 의료인들, 병원관리자 그리고 정부 및 정책 입안자들은 중환자실 수요의 급증에 대비하여 중환자실 병상이나 소모품뿐 아니라 중환자 진료 인력의 확보도 준비해야 한다. 부족한 집중치료자원들을 효율적으로 사용하기 위하여 중증환자들의 선별이 필요하다. 그리고 연구자들은 기존 치료법의 활용 및 실험요법들의 효능 확인 등과 같은 의문들을 밝혀야 한다. 좁은 지역, 국가내 확대된 지역, 국가 및 국제수준의 협력은 이 질환의 중증환자들에게 보다 나은 생존 기회를 제공할 수 있을 것이다.
