# Supplementary material
Source: PubMed Central journal article supplement (PMC7198848)
Supplement: mmc5.pdf [file mmc5.pdf]

# THE LANCET

## Respiratory Medicine

### Supplementary appendix 5

This translation in Nepali was submitted by the authors and we reproduce it as supplied. It has not been peer reviewed. *The Lancet's* editorial processes have only been applied to the original in English, which should serve as reference for this manuscript.

यो साराँसको नेपाली अनुवाद लेखकहरूद्वारा पेश गरेका हुन र हामीले यस्ताई बिना सम्पादन हुवहू पेश गरेकाछौ। लान्सेट सम्पादन प्रक्रियामा यो लेखको अङ्ग्रेजी पाठ मात्र समाविष्ट भएको अवगत गराईन्छ।

Supplement to: Phua J, Weng L, Ling L, et al, for the Asian Critical Care Clinical Trials Group. Intensive care management of coronavirus disease 2019 (COVID-19): challenges and recommendations. *Lancet Respir Med* 2020; published online April 6. [https://doi.org/10.1016/S2213-2600\(20\)30161-2](https://doi.org/10.1016/S2213-2600(20)30161-2).

कोरोना भाइरस रोग (कोभिड- १९) एसियाबाट विश्वभरि फैलिँदै गर्दा सघन उपचार कक्ष समुदाय (आईसीयू) यो विश्वव्यापी महामारीबाट उत्पन्न हुनसक्ने चुनौतीको सामना गर्न तयार रहनुपर्दछ । शीघ्र रोगनिदान र आइसोलेसन(सङ्क्रमित बिरामीलाई उपचार गर्न राखिने छुट्टै कक्ष) का लागी कार्यप्रगतिको व्यवस्थापन गर्ने, चिकित्सकीय व्यवस्थापन तथा सङ्क्रमणको रोकथाम कोभिड-१९ बाट सङ्क्रमित बिरामीहरुका लागि मात्र नभएर स्वास्थ्यकर्मी तथा अस्पतालबाटै हुनसक्ने सङ्क्रमणको जोखिममा रहेको अन्य बिरामीहरुका लागि पनि महत्वपूर्ण हुन्छ। कडारूपमा देखिएको श्वासप्रश्वाससम्बन्धी समस्याको व्यवस्थापन तथा रक्तसञ्चारलाई शन्तुलनमा राख्ने काम सबैभन्दा महत्वपूर्ण हो। सघन उपचार कक्षमा खटिएका चिकित्सक, अस्पताल प्रशासक, सरकार तथा नीतिनिर्माताहरुले पूर्वाधार र आवश्यक वस्तुको आपूर्तिमा मात्र नभई कर्मचारी व्यवस्थापनमा समेत जोड दिनुका साथै उनीहरू गम्भीर बिरामीका लागि आवश्यक पर्ने शय्याको क्षमता उल्लेख्य मात्रामा बढाउन तयार हुनुपर्दछ । आईसीयूमा उपलब्ध सीमित साधनस्रोतहरुको प्रयोग गरेर उपचार गर्नुपर्ने गम्भीर प्रकृतिका बिरामीहरुलाई पनि प्राथमिकताका आधारमा उपचार गर्नुपर्ने अवस्था आउन सक्छ। अनुसन्धानकर्ताहरुले नयाँ तथा प्रयोगात्मक उपचारविधीको भूमिकालगायत अनुत्तरित प्रश्नहरुको सम्बोधन गर्नुपर्दछ । स्थानीय, क्षेत्रीय, राष्ट्रिय तथा अन्तर्राष्ट्रिय स्तरमा हुने सहकार्यले गम्भीर अवस्थामा रहेको बिरामीहरुको बाँच्ने सम्भावनालाई ठूलो अवसर प्रदान गर्दछ ।
